# Supplementary material
Source: HighWire-hosted journal article supplement (https://bmjopen.bmj.com/content/12/3/e054369)
Supplement: inline-supplementary-material-1 [file inline-supplementary-material-1.pdf]

## Supplementary Tables

| Supplementary Table 1. Socioeconomic position (N=683) |       |       |
|-------------------------------------------------------|-------|-------|
|                                                       | Yes   | No    |
| <b>Ownership of household items</b>                   |       |       |
| Own television                                        | 73.0% | 27.0% |
| Own cupboard                                          | 80.1% | 19.9% |
| Own table                                             | 86.7% | 13.3% |
| Own fan                                               | 96.1% | 3.9%  |
| <b>Dwelling materials</b>                             |       |       |
| <b>Flooring material of house</b>                     |       |       |
| Earth/Sand                                            | 9.4%  |       |
| Other                                                 | 90.6% |       |
| <b>Walls of house</b>                                 |       |       |
| Cement                                                | 81.7% |       |
| Other                                                 | 18.3% |       |
| <b>Roof of house</b>                                  |       |       |
| Cement                                                | 72.2% |       |
| Other                                                 | 27.8% |       |
| <b>Cooking fuel used</b>                              |       |       |
| Liquid Petroleum Gas                                  | 76.5% |       |
| Wood                                                  | 19.8% |       |
| Other                                                 | 3.7%  |       |

..

| Supplementary Table 2. Knowledge of contraceptive methods (N=683) |       |       |
|-------------------------------------------------------------------|-------|-------|
| Contraceptive methods                                             | Yes   | No    |
| Female sterilization                                              | 78.6% | 21.4% |
| Male sterilization                                                | 73.8% | 26.2% |
| IUCD                                                              | 76.5% | 23.5% |
| Injectables (intramuscular)                                       | 91.2% | 8.8%  |
| Implants                                                          | 73.3% | 26.7% |
| Oral contraceptive pills                                          | 84.3% | 15.7% |
| Male condoms                                                      | 93.8% | 6.2%  |
| Emergency contraception                                           | 41.2% | 58.8% |
| Lactational amenorrhea method                                     | 32.4% | 67.6% |

..

| Supplementary Table 3. Self-efficacy for contraception (N=683)                  |                             |       |      |       |                          |                           |
|---------------------------------------------------------------------------------|-----------------------------|-------|------|-------|--------------------------|---------------------------|
| Self-efficacy statements                                                        | 1<br>[Strongly<br>Disagree] | 2     | 3    | 4     | 5<br>[Strongly<br>Agree] | Mean score<br>( $\pm$ SD) |
| I have easy access to contraceptives                                            | 0.7%                        | 6.5%  | 3.3% | 61.2% | 28.2%                    | 4.1 ( $\pm$ 0.8)          |
| I can discuss contraceptive methods with my husband/partner or anyone if I want | 9.5%                        | 26.4% | 2.4% | 42.8% | 18.9%                    | 3.4 ( $\pm$ 1.3)          |
| I can seek SRH/FP information if I need them                                    | 0.6%                        | 4.7%  | 1.9% | 66.2% | 26.6%                    | 4.1 ( $\pm$ 0.7)          |
| I can seek SRH/ FP services if I need them                                      | 0.6%                        | 5.4%  | 1.7% | 67.0% | 25.3%                    | 4.1 ( $\pm$ 0.7)          |

..

| Supplementary Table 4. Barriers to contraceptive use (N=683) |       |       |
|--------------------------------------------------------------|-------|-------|
| Barriers                                                     | Yes   | No    |
| <b>Individual barriers</b>                                   |       |       |
| Embarrassment/shyness                                        | 80.1% | 19.9% |
| Lack of awareness of adolescent friendly health services     | 73.3% | 26.7% |
| Pressure to have child after marriage                        | 56.0% | 44.0% |
| Fear of infertility due to use of contraceptives             | 62.0% | 38.0% |
| <b>Family member/society barriers</b>                        |       |       |
| Fear of parents                                              | 69.3% | 30.7% |
| Judgmental attitudes                                         | 63.4% | 36.6% |
| Disapproval of community gatekeepers                         | 45.7% | 54.3% |
| Family pressure to have children/not to use a method         | 55.9% | 44.1% |
| Son preference                                               | 59.0% | 41.0% |
| <b>Service provider barriers</b>                             |       |       |
| Inadequate counseling                                        | 51.9% | 48.1% |
| Reluctance to provide contraceptive services                 | 40.4% | 59.6% |
| Biasedness                                                   | 35.3% | 64.7% |
| Cultural taboos                                              | 32.0% | 68.0% |
| <b>Health facility location and service-related barriers</b> |       |       |
| Poor physical access                                         | 18.7% | 81.3% |
| Cost of services and transport                               | 17.1% | 82.9% |
| Lack of privacy                                              | 53.4% | 46.6% |
| Long waiting time                                            | 34.2% | 65.8% |
| Inconvenient opening hours                                   | 31.4% | 68.6% |
| Stock out of commodities                                     | 37.4% | 62.6% |
| Lack of female providers                                     | 55.2% | 44.8% |

..

| Supplementary Table 5. Exposure to contraception messaging in the past three months (N=683) |       |       |
|---------------------------------------------------------------------------------------------|-------|-------|
| Exposure through                                                                            | Yes   | No    |
| <b>Mass media</b>                                                                           |       |       |
| Radio                                                                                       | 47.9% | 52.1% |
| Television                                                                                  | 20.8% | 79.2% |
| Newspaper/magazine                                                                          | 7.8%  | 92.2% |
| Mobile phone (voice or text message)                                                        | 2.2%  | 97.8% |
| Brochure or flipchart                                                                       | 10.6% | 89.4% |
| Poster/hoarding board/billboard                                                             | 41.4% | 58.6% |
| Internet                                                                                    | 32.5% | 67.5% |
| Street drama                                                                                | 11.4% | 88.6% |
| <b>Interpersonal sources</b>                                                                |       |       |
| Mother's group                                                                              | 12.8% | 87.2% |
| Teachers                                                                                    | 38.6% | 61.4% |
| Government female community health volunteers                                               | 29.3% | 70.7% |
| OK female community health volunteers (PSI volunteers)                                      | 4.3%  | 95.7% |

...

| Supplementary Table 6. Fertility preferences among married women |                 |                      |               |
|------------------------------------------------------------------|-----------------|----------------------|---------------|
| Desire for children                                              | Pregnant (N=28) | Not pregnant (N=209) | Total (N=237) |
| Have another soon <sup>1</sup>                                   | 7.2%            | 15.8%                | 14.7%         |
| Have another later <sup>2</sup>                                  | 50.9%           | 44.7%                | 45.5%         |
| Have another, undecided when                                     | -               | 1.1%                 | 1.0%          |
| Undecided                                                        | 22.9%           | 21.1%                | 21.4%         |
| Want no more                                                     | 15.7%           | 16.4%                | 16.3%         |
| Declared infecund                                                | 3.2%            | 0.8%                 | 1.1%          |

<sup>1</sup>Wants next birth within 2 years<sup>2</sup>Wants to delay next birth for 2 or more years

...

| Supplementary Table 7. Modern contraceptive use by fertility preferences among married women who are not currently pregnant (N=209) |            |             |
|-------------------------------------------------------------------------------------------------------------------------------------|------------|-------------|
| Desire for children                                                                                                                 | Prevalence | Total women |
| Have another soon <sup>1</sup>                                                                                                      | 22.5%      | 33          |
| Have another later <sup>2</sup>                                                                                                     | 41.9%      | 94          |
| Have another, undecided when                                                                                                        | 31.6%      | 2           |
| Undecided                                                                                                                           | 26.8%      | 44          |
| Want no more                                                                                                                        | 36.7%      | 34          |
| Declared infecund                                                                                                                   | -          | 1           |

<sup>1</sup>Wants next birth within 2 years<sup>2</sup>Wants to delay next birth for 2 or more years
